# Supplementary material for: Glutathione S-transferase (GST) of American Cockroach, Periplaneta americana: Classes, Isoforms, and Allergenicity
Source: PubMed Central journal article supplement (PMC5764987; doi:10.1038/s41598-017-18759-z), 2018-01-11
Supplement: 41598_2017_18759_MOESM1_ESM.pdf [file 41598_2017_18759_MOESM1_ESM.pdf]

# Glutathione S-transferase (GST) of American Cockroach, *Periplaneta americana*: Classes, Isoforms, and Allergenicity

Nitat Sookrung<sup>1,2</sup>, Onrapak Reamtong<sup>3</sup>, Rojana Poolphol<sup>4,5</sup>, Nitaya Indrawattana<sup>6</sup>,  
 Watee Seesuyay<sup>2</sup>, Nawannaporn Saelim<sup>2,5</sup>, Pongsakorn Tantilipikorn<sup>7</sup>, Chaweewan Bunnag<sup>7</sup>,  
 Wanpen Chaicumpa<sup>2,5</sup>, Anchalee Tungtrongchitr<sup>2,5,\*</sup>

<sup>1</sup>Department of Research and Development, <sup>2</sup>Center of Research Excellence on Therapeutic Proteins and Antibody Engineering, <sup>4</sup> Graduate Program in Clinical Pathology, <sup>5</sup>Department of Parasitology, and <sup>7</sup>Department of Oto-rhino-laryngology, Faculty of Medicine Siriraj Hospital, Mahidol University, Bangkok, 10700, Thailand <sup>3</sup>Department of Molecular Tropical Medicine and Genetics and <sup>6</sup>Department of Microbiology and Immunology, Faculty of Tropical Medicine, Mahidol University, Bangkok 10400, Thailand

|     |                                                                |     |
|-----|----------------------------------------------------------------|-----|
| 1   | atgaccatcgacttctactacctgcccggcagcgcaccatgccggtcagctctcctggct   |     |
|     | M T I D F Y Y L P G S A P C R S A L L A                        | 20  |
| 61  | gcccaaggccatcgggtgtggatctgaacctcaaagtgcgaacctcatggctggcgaacat  |     |
|     | A K A I G V D L N L K V T N L M A G E H                        | 40  |
| 121 | ctcacgcctgagtttcttaagatgaatcctcagcatacgattccagccctaaacaacaac   |     |
|     | L T P E F L K M N P Q H T I P A L N N N                        | 60  |
| 181 | gtagctatattgtgggaaagccgagccattctaagtaagctggctaaccgggatggcaag   |     |
|     | V S Y L W E S R A I L S K L A N R Y G K                        | 80  |
| 241 | gacgactcgcctgtaccgcagtagcggcaaaaagcgagctcctgtgggacagagactgtact |     |
|     | D D S L Y R S T A K S E L L W D R D C T                        | 100 |
| 301 | tcgatattgttcccctgtaccattgatacggagaattcctttatgcaatttcatttagca   |     |
|     | S I L F P C T I D T E N S F M Q F H L A                        | 120 |
| 361 | aagcaacctgtagatcatgaaaagataaaagcaactagagaagcccttcgagtttttgaat  |     |
|     | K Q P V D H E K I K Q L E K P F E F L N                        | 140 |
| 421 | aagttcctggaatcgcaacagtttgtggcagaaaataagctcaccattgcggaacctggca  |     |
|     | K F L E S Q Q F V A E N K L T I A D L A                        | 160 |
| 481 | attgtctcctctgtttccactgctgacatcataggctttgatgtaagcaaataactcaaac  |     |
|     | I V S S V S T A D I I G F D V S K Y S N                        | 180 |
| 541 | gtcgccaaatggttcgagaaatgcaagaagattgttccaggctatgaggaactgaatcac   |     |
|     | V A K W F E K C K K I V P G Y E E L N H                        | 200 |
| 601 | tccggatgcttgaagttcaaggagatgtgcgataacctcgccaagaagtga            |     |
|     | S G C L K F K E M C D N L A K K -                              | 216 |

**Supplementary Figure 1. Nucleotide and deduced amino acid sequences of GST of American cockroach, *P. americana*, of this study (accession number MG255130).**

GST|Accession no.MG255130 -----MTIDFYYPGSA  
 GSTδ|V9Q2Q3 -----MPSIIILYGNELSP  
 GSTδ|V9Q3Y3 -----MAPPTLYDNPISP  
 GSTδ|V9Q4H6 -----MSPIIILYNHDGSP  
 GSTδ|V9Q328 -----MAGLKLYSVSDSP  
 GSTδ|V9Q4A2 -----MPKLRLYHAEASP  
 GSTδ|O76483 -----MTPVLYYLPSP  
 GSTδ|Q9XZ67 -----MPSEPIKFYYLAPSP  
 GSTδ|Q60GK5 -----MTIDLYYVPGSA  
 GSTδ|Q8N0B3 -----MPIDLYYVPGSA  
 GSTδ|A9QUN5 -----MTIDFYYPGSA  
 GSTδ|A7E1B7 -----MTIDFYYPGSA  
 GSTδ|G8XWV6 -----MTIDFYYPGSA  
 GSTδ|Q1M0Y4 -----MTIDFYYPGSA  
 GSTδ|G8XWU4 -----MTIDFYYPGSA  
 GSTδ|Q9GNE9 -----MDFYYLPGSA  
 GSTδ|P20432 -----MVDFFYYLPGSS  
 GSTδ|P42860 -----MDFYYLPGSA  
 GSTδ-like|Q2YFE3 -----MSKPIFYYPHPSG  
 GSTε|Q9GPL9 -----MPKPVLYTVHLSP  
 GSTε|Q9GPL8 -----MSNLVLYTLHLSP  
 GSTσ|P46429 -----MPKVVPHYFGAKG  
 GSTσ|V9Q3X5 -----MAPKYKLLYFPFRV  
 GSTσ|P41043 MADEAQAPPAEGAPPAEGEAPPPAEGAEGAVEG-GEAAPPAEPAEPIKHSYTLFYFNVKA  
 GSTσ|Q8MUR9 -----FNVKA  
 GSTσ|O18598 -----MAPSYKLYCYPVKA  
 GSTσ|V9Q487 -----MAAKYKLYFPVIMA  
 GSTσ|V9Q315 -----MAPKYKLYFPVKA  
 GSTω|Q86D85 -----MSNGKHLAKGSSPPLPDDGKLRLYSMRFCP  
 GSTθ|Q8MUQ1 -----MSKNLKYDYDLMSSQ  
 GSTζ|Q8MUQ5 -----MANVDILPESQPIILYSYWRSS

GST|Accession no.MG255130 PCRSVLLAAKAIGVDLNLKVTNLM--AGEHLTPEFLKMNQHTIPTLND---NGFCLWES  
 GSTδ|V9Q2Q3 PSRAAKMIAEKLGVDDVDFKRTYPI--KGECKKPEYLKINPMHTIPTIID---GPFTLSDS  
 GSTδ|V9Q3Y3 PCRLVRLVAGVIGVDLKVNVKDA--GIDMKSP EMLKKNPQHTVPTLED---NGLCLAES  
 GSTδ|V9Q4H6 PCCLVRLVAGVIGLELKKVDISDI--ENGMRNPEMLKKNPQHTIPTIED---DGLVITES  
 GSTδ|V9Q328 PSTAVKMALEALALEYTNVEVDFA--AGEHLSDDFSKKNPQREIPCLDD---NGFFLSES  
 GSTδ|V9Q4A2 PCRTVIRMVARTLGVDLQLVDVDDL--QNEHLKPQFLQMNPPHQVPLDLD---NGFYLPES  
 GSTδ|O76483 PCRSVLLAKMIGVELELKNLNM--EGEQLKPDFVELNPQHCIPTLDD---HGLVLWES  
 GSTδ|Q9XZ67 PCRAVMMARALDLELDLIPNTIM--DSDHKTP EYLKMNPPQHTIPTMDD---SGFILWES  
 GSTδ|Q60GK5 PCRAVLLTAKALNLNKLVLDLH--HGEQLKPEYLKLNPPQHTVPTLVD---DGLSIWES  
 GSTδ|Q8N0B3 PCRSVLLAAKAVGVDLNLKLTDLK--SGQHLTPEFLKLNPPQHNTPTLVD---NGFVLNES  
 GSTδ|A9QUN5 PCRSVLLAAKAFGVNLNKVTNLM--AGEHLTPEFLKMNQHTIPTLND---NGFCLWES  
 GSTδ|A7E1B7 PCRSVLLAAKAFGVNLNKVTNLM--AGEHLTPEFLKMNPPQHTIPTLND---NGFCLWES  
 GSTδ|G8XWV6 PCRSVLLAAKAFGVNLNKVTNLM--AGEHLTPEFLKMNPPQHTIPTLND---NGFCLWES  
 GSTδ|Q1M0Y4 PCRSVLLAAKAIGVDLNLKVTNLM--AGEHLTPEFLKMNPPQHTIPTLND---NGFYLPES  
 GSTδ|G8XWU4 PCRSVLLAAKAIGVDLNLKVTNLM--AGEHLTPEFLKMNPPQHTIPTLND---NGFCLWES  
 GSTδ|Q9GNE9 PCRAVQMTAAAVGVELNKLNTNLM--AGEHMKPEFLKINPPQHCIPTLVD---NGFALWES  
 GSTδ|P20432 PCRSVIMTAKAVGVELNKLKLNQ--AGEHLKPEFLKINPPQHTIPTLVD---NGFALWES  
 GSTδ|P42860 PCRSVLMTAKALGVELELKLNTLQ--AGEHLKPEFLKINPPQHTIPTLVD---GDFALWES  
 GSTδ-like|Q2YFE3 PCRTVSTVAKILNVDMMEMKLDLL--TKEHLNPEFLKVNPPHKKVPTFVD--SDGFVDES  
 GSTε|Q9GPL9 PCRAVELTAKALGLELERKLVNLL--AGENLTPEFLKLNPKHTIPVLDL---NGTIISES  
 GSTε|Q9GPL8 PCRAVELTAKALGLELEKQKTINLL--TGDHLKPEFVKLNPPQHTIPVLDL---NGTIISES  
 GSTσ|P46429 WARP-MLLAYGGIELEDFYRFEY----QWPEFKPNTPFQMPVLEI---DGKQTHQS  
 GSTσ|V9Q3X5 IAEPPIRFILAYGVADYEDVRIEFS----DWPPPKPDPYGTMPVLEV---DGKKGQS  
 GSTσ|P41043 LAEPLRYLFAYGNQEYEDVVRTD----EWPALKPTMPMGQMPVLEV---DGKRVHQS  
 GSTσ|Q8MUR9 LGEPPLRFLLSYGNLPPFDDVRI TRE----EWPALKPTMPMGQMPVLEV---DGKQVHQS  
 GSTσ|O18598 LGEPPIRFLLSYGKDFEDYRFQEG----DWPNLKPSMPFGKTPVLEI---DGKQTHQS  
 GSTσ|V9Q487 LGEPPIRFLLSYGKIEFEDERCERE----KWPSVKESMPFGQMPVLEI---DGKKTWQS  
 GSTσ|V9Q315 LGEPPIRFLLSYGNMEFEDDRFERE----KWPSIKPSMPFGQMPVLEF---DGKKTWQS  
 GSTω|Q86D85 YAQRVHMLMDAKKIPIYHAIYINLS----EKPEWYLEKNPLGKVPAL EIPGKEGVTLYES  
 GSTθ|Q8MUQ1 PSRALWIFLEKTKLPEYKCLINLG--KGEHLTEEFKAINRFQKVPCTD---SQIKLAES  
 GSTζ|Q8MUQ5 CSWRVRIALNLKEIPYDIKPISLIKSGGEQHCNEYREVNPMEQVPALQI---DGHTLIES  
 \* : \*

GST|Accession no.MG255130 RAILSYLADQYKGD---DSLYPKD-AKKRALVDQRLYFDIRTYHRFGEY---YYPYIF  
 GSTδ|V9Q2Q3 HAIIVAYLVDRFGKN---DSLYPKD-IQKRKSVNERLCFDISL-FTKVLKF---VVGPLL  
 GSTδ|V9Q3Y3 RAISMYLISKYAKD---DSLYPKD-VNKRVLVDQRLFYDQD-LYNRILSV---FLP-KF  
 GSTδ|V9Q4H6 RAIAMYLVSRYAKD---DSLYPKE-LQRRVLVDQRLFFDQD-LYNRIMAV---CNP-LF  
 GSTδ|V9Q328 VAILQYLADKYGPG---HSLYPRD-PQQRALVNHRALFNISTYARIAEY---AVAPIF  
 GSTδ|V9Q4A2 RAI IAYLVNDAK---DSLYPRD-PKKRATVNRMLFFDAGTLWMNYHIY---QMP-IF  
 GSTδ|O76483 RVILAYLVSAAYGKD---ENLYPKD-FRSRAIVDQRLHFDLGTLYQRVVDY---YFPTIQ  
 GSTδ|Q9XZ67 RAILAYLVNAYGKD---DSLYPKN-PRQRAIVDQRLNFDIGTLFPRYSNL---YFPMFL  
 GSTδ|Q60GK5 RAIITYLVNKYAKD---SSLYPED-PKARALVDQRLYFDIGTYLQRFSDY---YFPQVF  
 GSTδ|Q8N0B3 RAIMTYLADQYKGD---DSLYPKD-PKKRAKVNQRLYFDMGTLYQSFQDA---YYPHMF

GSTδ|A9QUN5 RAILSYLADQYGKD---DSLYPKD-PKKRALVDQRLYFDLGTLYQRFQDY----YYPIMF  
GSTδ|A7E1B7 RAILSYLADQYGKD---DSLYPKD-PKKRALVDQRLYFDLGTLYQRFQDY----YYPIMF  
GSTδ|G8XWV6 RAILSYLADQYGKD---DSLYPKD-PKKRALVDQRLYFDLGTLYQRFQDY----YYPIMF  
GSTδ|Q1M0Y4 RAILSYLADQYGKD---DSLYRRD-AKKRALVDQRLYFDLGTLYHRRFGEY----YYPYIF  
GSTδ|G8XWU4 RAILSYLADQYGKD---DSLYPKD-AKKRALVDQRLYFDLGTLYHRRFGEY----YYPYIF  
GSTδ|Q9GNE9 RAICTYLAEKYKGD---DKLYPKD-PQKRAVNVQRLYFDMGTLYQRFADY----YYPQIF  
GSTδ|P20432 RAIQVYLVEKYGKT---DSLYPKC-PKKRAVINQRLYFDMGTLYQSFANY----YYPQVF  
GSTδ|P42860 RAIMVYLVEKYGKN---DSLFPKC-PKKRAVINQRLYFDMGTLYKSFADY----YYPQIF  
GSTδ-like|Q2YFE3 RVIAMYLVESRKPDP---SFLYPKNDLKKRIQIDRWLHYDINLS-TTISAP----MF-CVF  
GSTε|Q9GPL9 HAIMIYLVTKYQGD---DSLVPKD-PVKQARVNSALHFESGVLFRMRFN----TELVFF  
GSTε|Q9GPL8 HAIMIYLVTKYQGD---DSLVPKD-PVKQARVNSALHFESGVLFRMRFN----TELVFF  
GSTσ|P46429 LAISRYLGRKYGLA-----GND-IEEDFEIDQIVDFVND-IRASAASV----EYEQDA  
GSTσ|V9Q3X5 IPICRYLAKQYGLL-----AEN-DWDNAQIDAAVDAIND-LRMSIKNF----YFEENG  
GSTσ|P41043 ISMARFLAKTVGLC-----GAT-PWEDLQIDIVVDIND-FRLKIAVV----SYEPED  
GSTσ|Q8MUR9 VAMSRYLANQVGLA-----GAD-DWENLMIDTVVDVND-FRLKIAVV----SYEPDD  
GSTσ|O18598 VAISRYLKGQFGLS-----GKD-DWENLEIDMIVDTISD-FRAAIANY----HYDADE  
GSTσ|V9Q487 LAICRYLKGQMGLA-----GAN-DWEDLQIDMAIETVTD-LRLKIANY----WYETDE  
GSTσ|V9Q315 TAICRYLKGQKLKA-----GDN-DWEALQIDMAADCLTD-LRMKLGFS----FYESDE  
GSTω|Q86D85 LVLSDYIEEAYSQA---QRKLYPAD-PFKAQDRILIERFAGS---VIGP----YFPIIF  
GSTθ|Q8MUQ1 VAIFRYLCREYQVP---DHWYPAD-SRRQALVDEYLEWQHNNRTRATCAIYFYVWLRPRM  
GSTζ|Q8MUQ5 VSIMYYLEETRPQ---RPLMPQD-VLKRAKVRICEVIASGV-QPLQNL----IV-LIH  
: ::

GST|Accession no.MG255130 AKQAADPEKM---KKLEEF---EFLNKFLE---SQEFVAGNKLTIADLAIVSSVSTA  
GSTδ|V9Q2Q3 RTHEPTEELR---NDCIDGL---ETVERFLS---ASKFIAGDDLTVADYCYCTITFV  
GSTδ|V9Q3Y3 FGKQTDPSI---EKVNEGL---ETLNRMLD---GKQWLAGDNITLADYAIANTLSAL  
GSTδ|V9Q4H6 YGKTVAESDA---DRMKDGL---DTLSRMLD---GKQWLAGDHVTLADYAVAVSLATL  
GSTδ|V9Q328 FDYKRTPEGL---NKLKIAL---NVLNLTILERQ-GTKFAAEGHMTLADLSLIASVSSL  
GSTδ|V9Q4A2 YGQPGDPEKQ---KKMLEAF---ALFDKLE---GKEWAAGSHVTIADYALAVTATSA  
GSTδ|O76483 LGAHLDTQTK---AKLAEAL---GWFEMALK---QYQWSAANHFTIADIALCVTVSQI  
GSTδ|Q9XZ67 RGDEYNQENA---DKLNEAL---GWLNIFLE---KSAFVAGDNLTADISIVTITNL  
GSTδ|Q60GK5 AGAPADKAKN---EKVQEAL---QLLDKFLE---GQKYVAGPNLTADLSLIASVSSL  
GSTδ|Q8N0B3 GGAPLDEDKK---KKLGDAL---VFLDGFLE---KSAFVAGEDLTADLAIVASISTI  
GSTδ|A9QUN5 AKASPDAEKM---KKLEEF---QFLDKFLE---GQKQVAGNSLTADIAIASVSTA  
GSTδ|A7E1B7 AKASPDAEKM---KKLEEF---QFLDKFLE---GQKQVAGNSLTADIAIASVSTA  
GSTδ|G8XWV6 AKASPDAEKM---KKLEEF---QFLDKFLE---GQKQVAGNSLTADIAIASVSTA  
GSTδ|Q1M0Y4 AKQAADPEKM---KKLEEF---EFLNKFLE---SQEFVAGNKLTIADLAIVSSVSTA  
GSTδ|G8XWU4 AKQAADPEKM---KKLEEF---EFLNKFLE---SQEFVAGNKLTIADLAIVSSVSTA  
GSTδ|Q9GNE9 AKQANAENE---KKMKDAV---DFLNTFLD---GHKYVAGDSLTIADLTVALTVSTY  
GSTδ|P20432 AKAPADPEAF---KKLEAFA---EFLNFTLE---GQDYAAGDSLTVADIALVAVSTF  
GSTδ|P42860 AKAPADPELY---KKMEAAF---DFLNTFLE---GHQYVAGDSLTVADLALLASVSTF  
GSTδ-like|Q2YFE3 RGHQVQDYQV---EQKQETL---KTLDGVMQSFEGKFLTADQFTLADIAMYFSLNTM  
GSTε|Q9GPL9 ARKPEIPEDR---IEYVRTAY---RLLEDL---QSDYVAGSRMTIADLSCISSVASM  
GSTε|Q9GPL8 FGKSDIPEDR---VEYVQSY---ELLEDL---VDDFVAGPTMTIADFCIASSI  
GSTσ|P46429 ANKEVK-----HEENMKNKYPFQNLKLEIIT---KNGFLALGRLTADWDFVGMFDYL  
GSTσ|V9Q3X5 STKNNM-----KEKLMKEAVPFYKLEEMVK---NNGGYLAGGKLTWGDLYLTTMLBLF  
GSTσ|P41043 EIKEK-----LVTLNAEVIPIFYLEKLEQTVK---DNDGHLALGKLTWADVYFAGITDYM  
GSTσ|Q8MUR9 EIKEK-----LVTLNNEVIPIFYLEKLEDDIAR---DNNGYLANGKLSWADIYFTAILDYL  
GSTσ|O18598 NSKQK-----WDPLKKEIPIPYTKKFDEVVK---ANGGYLAAGKLTWADYFVAILDYL  
GSTσ|V9Q487 AQKEK-----KEPLFNETLPLFLPRLDNLVK---ENGGYLANGKLSWADLYIAVLVDYL  
GSTσ|V9Q315 AVKEK-----KEPIKEFLPFLPRLDNLVK---ENGGYLANGKLSWADYFAGILDYV  
GSTω|Q86D85 AADGIPPGAI---TEFGAGL---DIFEKELKA-RGTPYFGDGKPMIDYMWPCBERV  
GSTθ|Q8MUQ1 FGTKVDPKQAEKYRQMEGTL---DFIEREYLG-SGARFIAGDEITVADLLAAACEIEQP  
GSTζ|Q8MUQ5 VGEEKKKEWA---QHWITRGF---RAIEKLLST-SAGKFCVGEITLADCLLPVQVFNA  
\*  
. .

GST|Accession no.MG255130 -----DIMGF-DV-SKYSNVAKWFEKCKKIVPGYE--ELNHSGCLFKFKEMCDNLAKK  
GSTδ|V9Q2Q3 -----DIPQKQVI-DL-KKYKNIQRWMDLIHKTCPLFT--KYDQIAEKAFQIYLEDGPY-  
GSTδ|V9Q3Y3 -----EFAPEFGI-DP-TKQPNIKQWLPRVRESSSPKYG--ESL----KEFREALKKMAQK  
GSTδ|V9Q4H6 -----EYNPEFAI-DA-AKHPNITQWISRLEESSNTYR--EHI----ELFFETVRKATEE  
GSTδ|V9Q328 -----EAVEF-DL-TPWARVQRWYADFKQAAPRLW--AVAEPAMLELRAFNSPDDL  
GSTδ|V9Q4A2 -----QWSGV-DL-KVYDNVTRWLERTKEGITCFD--EINNSSFAALKELLQKLEK  
GSTδ|O76483 -----EAFQF-DL-HPYPRVRAWLQCKDELQGHGYKEINETGAETLAGLFRSKLQK  
GSTδ|Q9XZ67 -----DAFKF-DF-SEHENLTKWFERTKKALEPYDWEDIDETGAQMLADFLKREH--  
GSTδ|Q60GK5 -----EASDI-DF-KKYANVWRWYETVKSTAPGYQ--EANEKGLAEFKGLVNSMLKK  
GSTδ|Q8N0B3 -----EAVEY-DL-SPYKNINSWYSKVKAAPGYK--EANEKAGKFGQMFKAMTQK  
GSTδ|A9QUN5 -----AILGF-DI-TRYPNVNKWFENAKKVIIPGYD--ELNHSGCLEFRKMWDNLTKQ  
GSTδ|A7E1B7 -----AILGF-DI-TRYPNVNKWFENAKKVIIPGYD--ELNHSGCLEFRKMWDNLTKQ  
GSTδ|G8XWV6 -----AILGF-DI-TRYPNVNKWFENAKKVIIPGYD--ELNHSGCLEFRKMWDNLTKQ  
GSTδ|Q1M0Y4 -----DIMGF-DV-SKYSNVAKWFEKCKKIVPGYE--ELNHSGCLFKFKEMCDNLAKK  
GSTδ|G8XWU4 -----DIMGF-DV-SKYSNVAKWFEKCKKIVPGYE--ELNHSGCLFKFKEMCDNLAKK  
GSTδ|Q9GNE9 -----DVAGF-EL-SKYPHVAAWYERTRKEAPGAA--I-NEAGIEEFKRYFEK----  
GSTδ|P20432 -----EVAKF-EI-SKYANVNRWYENAKKVTPGWE--E-NWAGCLEFKKYFE-----  
GSTδ|P42860 -----EVAGF-DF-SKYANVAKWYANAKTVAPGFD--E-NWEGCLEFKKFFN-----  
GSTδ-like|Q2YFE3 -----EVYP-KYF-KF-DDYPNLKSWYHRVAEALKQYDTEGTIPKAIETMFKQFIQRAAE  
GSTε|Q9GPL9 -----V--GFIPI-ER-SDFPRVHGWIERMKQ-LPYYE--EINGAGATELAEFIDMLAK  
GSTε|Q9GPL8 -----M--GVVPL-EQ-SKHPRYAWIDRLKQ-LPYYE--EANGGGTDLGKFLVLAKEE

```

GSTσ|P46429      -----KKMLRMPDLEEQYPIFKKPIETVLSNPCLKAYLDSAPKKEF-----
GSTσ|V9Q3X5      -----DHDLEC-EITKDYPHLATLRNKVVNIPSIKTWIEKRPKSER-----
GSTσ|P41043      -----NYMVKR-DLLEPYPALRGVVDVAVNALEPIKAWIEKRPVTEV-----
GSTσ|Q8MUR9      -----NYMTKS-DLVANHPNLQRVVDNVTSIESIRSVIDKRPKTEI-----
GSTσ|O18598      -----NHMAKE-DLVANQPNLKALEKVLGLPAIKAWVAKRPPTDL-----
GSTσ|V9Q487      -----NTMVGf-DLTKDYPNLAELKNKVLEIPIAIEWVDRPKTDL-----
GSTσ|V9Q315      -----NHMAGF-DITKDYANLAALKNKVLELPAIKEWIAKRPVSEV-----
GSTω|Q86D85      DLLKFALGDKYEL-DK-ERFGKLLQWRELMEKDDAVKQ----SFISTEDHTKFLQSRKNG
GSTθ|Q8MUQ1      -----RMAGY-DPCEGRPNLTQWMARVRETNPY--DQAHK---LVNKFAQDTASK
GSTζ|Q8MUQ5      -----RRFHV-DL-RPYPIILRID-RELEGHPAFR--AAHPS-----

```

|           |                       | % identity (compared to MG255130) |
|-----------|-----------------------|-----------------------------------|
| GST       | Accession no.MG255130 | 100.0                             |
| GSTδ      | V9Q2Q3                | 32.9                              |
| GSTδ      | V9Q3Y3                | 43.8                              |
| GSTδ      | V9Q4H6                | EKKNAQQK----- 33.6                |
| GSTδ      | V9Q328                | SALRHYPYHPVRASK 34.6              |
| GSTδ      | V9Q4A2                | LAEMSVD-----K 42.7                |
| GSTδ      | O76483                | ----- 46.0                        |
| GSTδ      | Q9XZ67                | ----- 48.4                        |
| GSTδ      | Q60GK5                | ----- 55.6                        |
| GSTδ      | Q8N0B3                | ----- 60.6                        |
| GSTδ      | A9QUN5                | ----- 81.5                        |
| GSTδ      | A7E1B7                | ----- 82.4                        |
| GSTδ      | G8XWV6                | ----- 81.9                        |
| GSTδ      | Q1M0Y4                | ----- 98.1                        |
| GSTδ      | G8XWU4                | ----- 99.5                        |
| GSTδ      | Q9GNE9                | ----- 58.3                        |
| GSTδ      | P20432                | ----- 61.6                        |
| GSTδ      | P42860                | ----- 61.1                        |
| GSTδ-like | Q2YFE3                | AEKH----- 31.2                    |
| GSTε      | Q9GPL9                | NAKL----- 39.5                    |
| GSTε      | Q9GPL8                | NAKA----- 39.6                    |
| GSTσ      | P46429                | ----- 22.7                        |
| GSTσ      | V9Q3X5                | ----- 21.2                        |
| GSTσ      | P41043                | ----- 11.0                        |
| GSTσ      | Q8MUR9                | ----- 17.5                        |
| GSTσ      | O18598                | ----- 16.8                        |
| GSTσ      | V9Q487                | ----- 23.8                        |
| GSTσ      | V9Q315                | ----- 21.7                        |
| GSTω      | Q86D85                | ENNYDILA----- 18.8                |
| GSTθ      | Q8MUQ1                | AKL----- 26.5                     |
| GSTζ      | Q8MUQ5                | ---NQPDCEPPEAAK 23.3              |

**Supplementary Figure 2. Alignment (Clustal Omega Multiple Sequence Alignment) and percent identity of amino acid sequence of *P. americana* rGST of this study (accession number MG255130) with GSTs of other insects in Figure 1.**

```

1      11      21      31      41      51      60
|      |      |      |      |      |      |
MTIDFY YLPGSAPCRSVLLA AKAIGVDLNLKVTNLMAGEHLTPEFLKMNPQH TIPTLNDN
<-β1> <-----α1-----> <-β2> <-α2-> <β3>
BCPred .....MNPQHTIPTLNDN
AAP .....NPQHTIPTLNDN
FBCPred MTIDFY YLPGSAPCRSVLLA .....PQHTIPTLNDN
Pep1 MTIDFY YLPGSAPCRSVLLA-----
Pep2 -----MNPQHTIPTLNDN
Pep3 -----
Pep4 -----
Pep5 -----
Pep6 -----

```

```

61      71      81      91      101      111      120
|      |      |      |      |      |      |
GFCLWESRAILSYLADQY GKDDSLYPKDAKKRALVDQR LYFDIR TLYHRFG EYYYPIYFA
<β4> <-----α3-----> <-----α4-----> <-----α5----->
BCPred GFCLWES .....PIYFA
AAP GFCLWESR .....QY GKDDSLYPKDAKKRALVD .....
FBCPred GFCLWESRA ..SYLADQY GKDDSLYPKDAKK .....YFA
Pep1 -----
Pep2 GFCLWESRA-----
Pep3 GFCLWESRAILSYLADQY GK-----
Pep4 -----SYLADQY GKDDSLYPKDAKKRALVD-----
Pep5 -----PIYFA
Pep6 -----

```

```

121      131      141      151      161      171      180
|      |      |      |      |      |      |
KQAADPEKMKKLEEA FEFLNKFLESQEFVAGNKL TIADLAI VSSVSTADIMGF DVSKYSN
<-----α6-----> <-----α7-----> <-
BCPred KQAADPEKMKKLEEA .....
AAP .....
fbcpred KQAADPEKMKKLEEA FE .....
Pep1 -----
Pep2 -----
Pep3 -----
Pep4 -----
Pep5 KQAADPEKMKKLEEA FE-----
Pep6 -----

```

```

181      191      201      211
|      |      |      |
VAKWFEKCKKIVPGYEELN HSGCLKFKEMCDNLAKK 216
---α8-----> <-----α9----->
BCPred .....
AAP .....KCKKIVPGYEELN HSGCLKF .....
FBCPred .....
Pep1 -----
Pep2 -----
Pep3 -----
Pep4 -----
Pep5 -----
Pep6 -----KCKKIVPGYEELN HSGCLKF-----

```
